# Supplementary material for: Nitrogen-doped biomass-derived carbon dots for fluorescence determination of sunset yellow
Source: Royal Society of Chemistry journal article supplement (doi:10.1039/d3ay01944f), 2024-01-01
Supplement: d3ay01944f1.pdf [file d3ay01944f1.pdf]

## Supporting information

### Nitrogen-doped biomass-derived carbon dots for fluorescent determination of Sunset Yellow

Qian Zhang<sup>a</sup>, Xiaoqi Wang<sup>a</sup>, Lili Yuan<sup>a</sup>, Lina Yu<sup>a</sup>, Congying Shao<sup>a\*</sup>, Hongxing Jia<sup>b,c\*</sup>,  
Shun Lu<sup>d\*</sup>

<sup>a</sup> Key Laboratory of Green and Precise Synthetic Chemistry and Applications, Ministry of Education, School of Chemistry and Materials Science, Huaibei Normal University, Anhui 235000, China

<sup>b</sup> College of Materials Science and Engineering, Chongqing University, Chongqing 400044, China

<sup>c</sup> National Engineering Research Center for Magnesium Alloys, Chongqing University, Chongqing 400044, China

<sup>d</sup> Chongqing Institute of Green and Intelligent Technology, Chinese Academy of Sciences, Chongqing 400714, China

\* Corresponding authors

Email addresses: [shaocongying@163.com](mailto:shaocongying@163.com) (C. Shao), [jhx@cqu.edu](mailto:jhx@cqu.edu) (H. Jia), [lushun@cigit.ac.cn](mailto:lushun@cigit.ac.cn) (S. Lu)

Figure: 4

Table: 0

Pages: 5

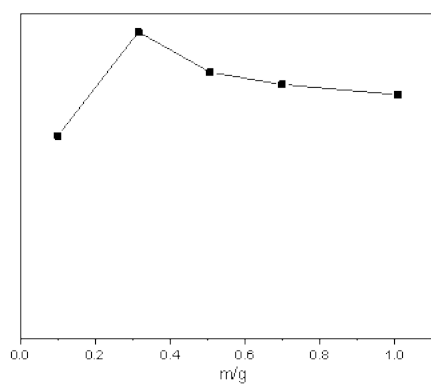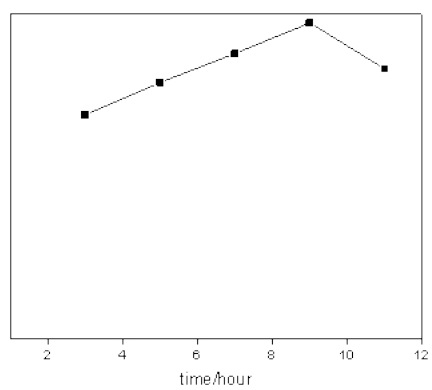

**Fig. S1** Optimization of synthesis conditions. (A) Effect of the mass of lycium ruthenicum.(B) The impact of reaction time.

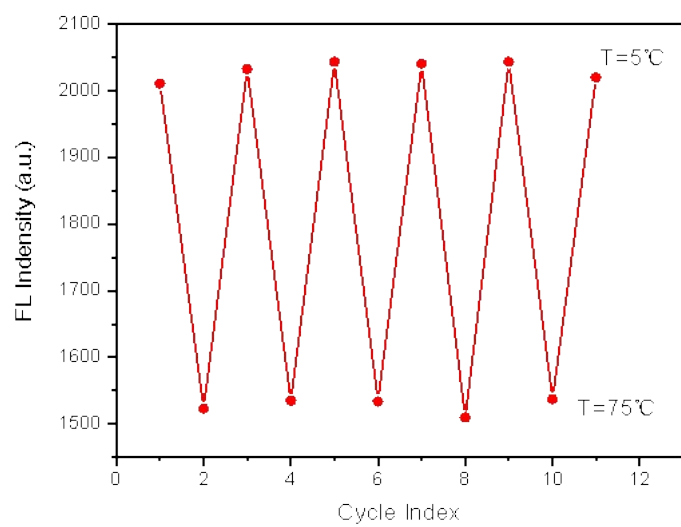

**Fig. S2** Temperature reversibility study of N- CDs between temperature 5 °C to 75 °C.



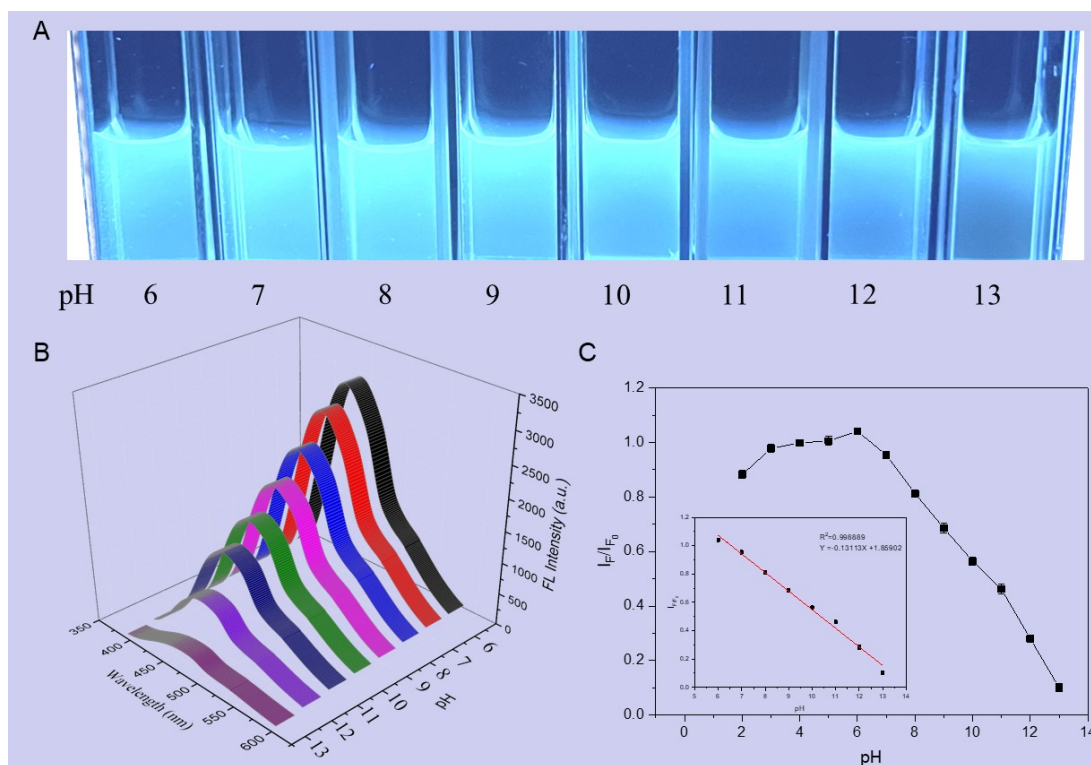

**Fig. S4** (A) Photographs of the corresponding N-CDs in BR buffer solutions with pH = 6-13 under 365 nm UV light. (B) Fluorescence spectra of the N-CDs in different pH values of BR solution with excitation wavelength at 367 nm. (C) Fluorescent intensity of N-CDs in BR buffer solutions with various pH values (inset: a linear relationship between PL intensity and pH).
